# Supplementary material
Source: publisher site journal article supplement (https://www.spandidos-publications.com/5758/downloadSupplementary)
Supplement: Supplementary file 1 [file downloadSupplementary]

## Sheet: Sheet1
Table SV. Significantly different metabolites involved in nucleotide synthesis in PKC and HKT groups.
Ionisation mode	Metabolites	Mean PKC	Mean HKT	VIP	P-value	Log2Foldchange	Regulation
ESI-	UDP	2.14632e+07	6.58718e+06	1.37945	0.00322784	-1.70413	Down
ESI-	Xanthurenic acid	5.47633e+06	1.79295e+06	1.34473	0.007925	-1.61087	Down
ESI-	XMP	1.14476e+07	4.68429e+06	1.50378	0.000422515	-1.28915	Down
ESI+	Deoxyadenosine	6.07614e+06	2.55508e+06	1.41798	0.00137456	-1.24979	Down
ESI-	Thymidine	4.29637e+07	2.38063e+07	1.30486	0.0193975	-0.851773	Down
ESI-	Deoxythymidine	4.29637e+07	2.38063e+07	1.30486	0.0193975	-0.851773	Down
ESI+	Thymine	6.35904e+07	3.55945e+07	1.19457	0.0185189	-0.837155	Down
ESI+	Cytidine 5'-diphosphocholine	1.28018e+07	7.22678e+06	1.10357	0.0367868	-0.824921	Down
ESI+	Adenine	2.37626e+08	1.38153e+08	1.18559	0.0320024	-0.782422	Down
ESI+	1,3-Dimethyluracil	3.05509e+08	2.03289e+08	1.12281	0.0336321	-0.587682	Down
ESI-	GTP	5.15031e+06	9.47804e+06	1.22919	0.0241856	0.87993	Up
ESI-	CDP	1.41327e+07	9.71541e+06	0.997331	0.100069	-0.540689	down
ESI-	ADP	1.12769e+08	8.09953e+07	0.94147	0.112817	-0.477465	down
ESI+	Guanine	1.07936e+09	9.09829e+08	0.911949	0.13696	-0.246506	down
ESI-	UMP	9.74411e+07	6.30578e+07	0.815455	0.175847	-0.627855	down
ESI-	GMP	1.07387e+08	6.85483e+07	0.778119	0.211078	-0.647628	down
ESI-	dCDP	86852.5	60174.7	0.618659	0.359831	-0.529411	down
ESI-	CTP	7.64575e+06	7.00414e+06	0.459369	0.473752	-0.126451	down
PKC, plain normoxia group; HCT, plateau hypoxia group; ESI
